# Supplementary material for: Tunable structural and optical properties of AgxCuyInS2 colloidal quantum dots
Source: Royal Society of Chemistry journal article supplement (doi:10.1039/d2nj03169h), 2022-01-01
Supplement: d2nj03169h1.pdf [file d2nj03169h1.pdf]

## Electronic Supporting Information

### Tunable structural and optical properties of $\text{Ag}_x\text{Cu}_y\text{InS}_2$ colloidal quantum dots

Shanna-Kay Ming,<sup>a</sup> Richard A. Taylor,<sup>\*a</sup> Paul D. McNaughtner,<sup>b</sup> David J. Lewis,<sup>c</sup> and Paul O'Brien<sup>b,c</sup>

**Table S1.** XPS data of atomic composition for CIS quantum dots.

| Sample  | Atomic composition/ % |       |       |       |       |
|---------|-----------------------|-------|-------|-------|-------|
|         | Ag 3d                 | Cu 2p | In 3d | O 1s  | S 2p  |
| CIS-0   | -                     | 1.85  | 4.66  | 7.48  | 10.87 |
| CIS-1.1 | 0.17                  | 1.70  | 11.76 | 20.25 | 10.42 |
| CIS-1.5 | 0.18                  | 0.86  | 6.09  | 24.11 | 7.42  |
| CIS-2.2 | 0.90                  | 3.94  | 9.03  | 4.33  | 23.30 |
| CIS-5.0 | 1.04                  | 1.03  | 12.96 | 20.48 | 10.03 |
| CIS-6.8 | 2.02                  | 1.74  | 11.71 | 18.31 | 10.09 |

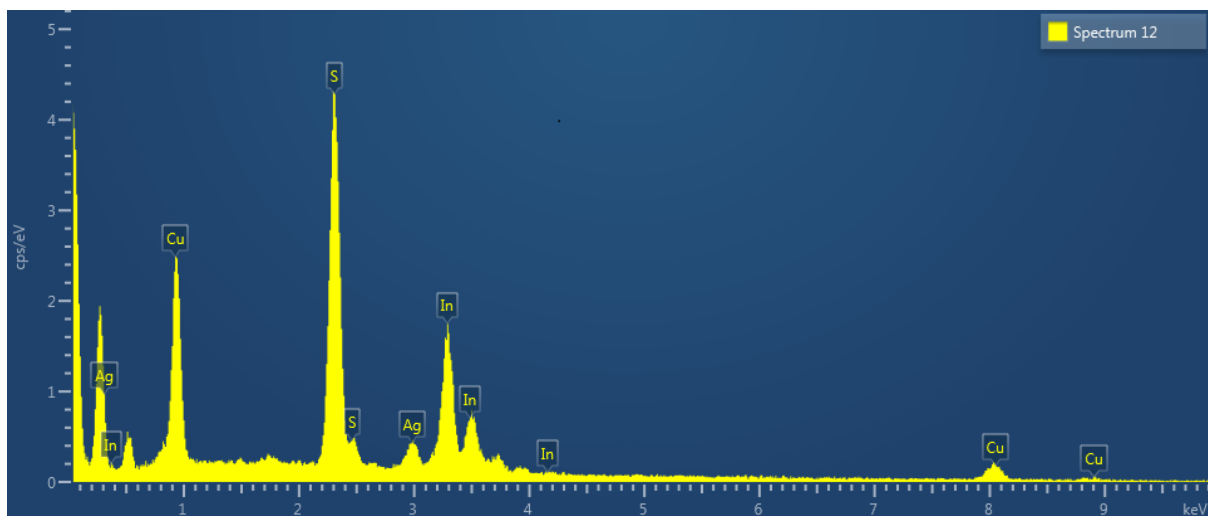

**Fig. S1.** Representative EDS spectrum for CIS quantum dots; example, CIS-5.0.

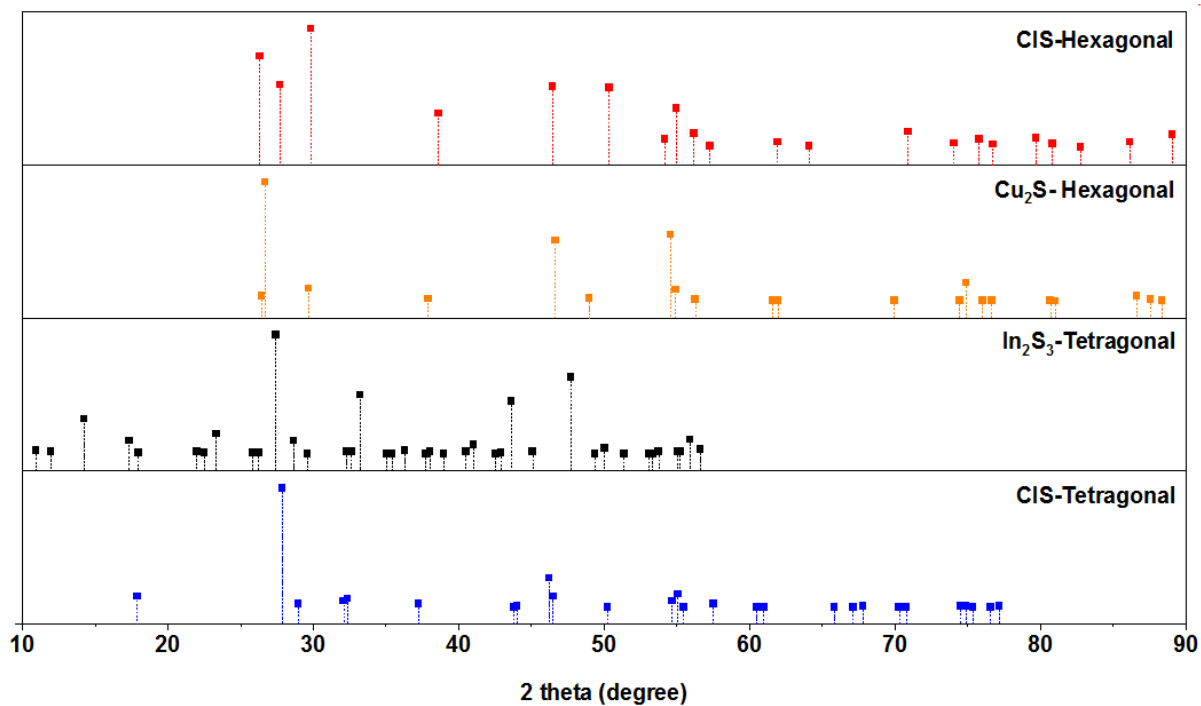

**Fig. S2.** Reference powder X-ray diffractograms for CIS wurtzite (hexagonal structure, ICDD reference no.01-077-9459), CIS chalcopyrite (tetragonal structure, ICDD reference no.00-027-0159), Cu<sub>2</sub>S (hexagonal structure, ICDD reference no.04-010-5153) and In<sub>2</sub>S<sub>3</sub> (tetragonal structure, ICDD reference no.00-027-0159).

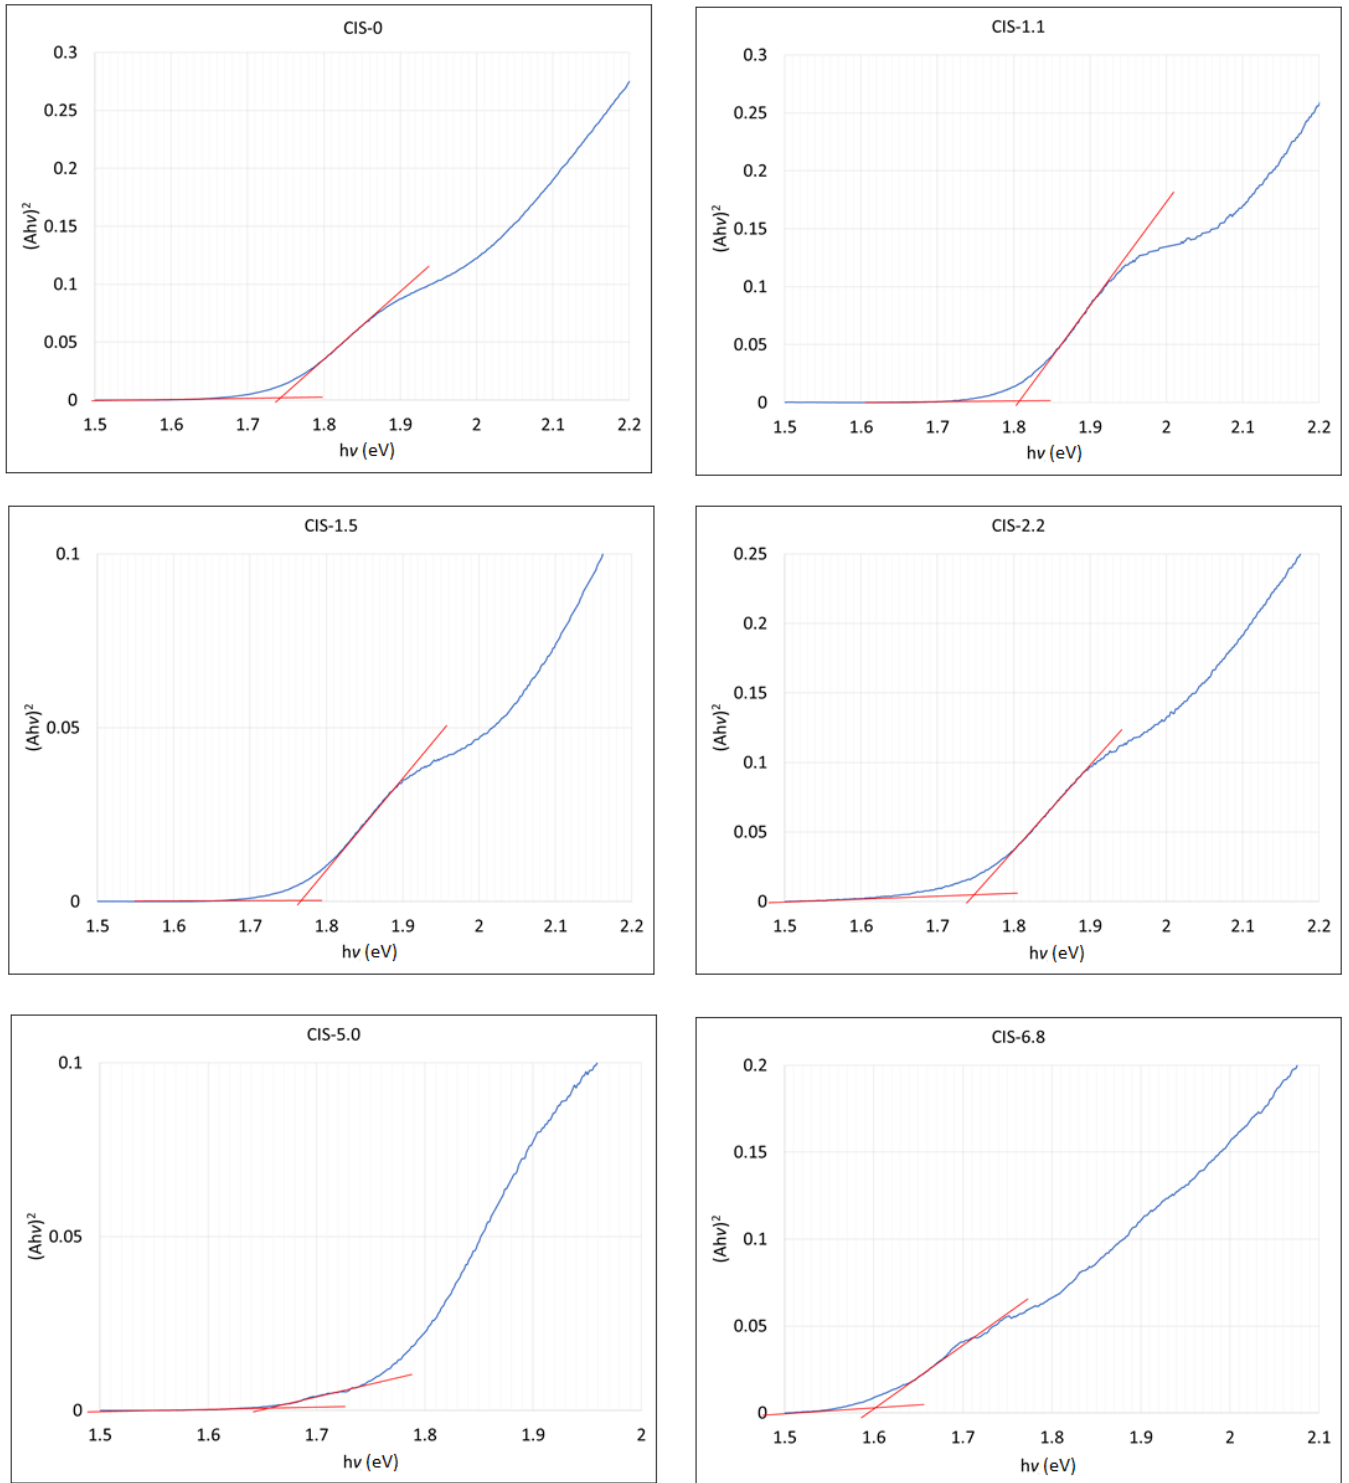

**Fig. S3.** Tauc plots for CIS quantum dots.

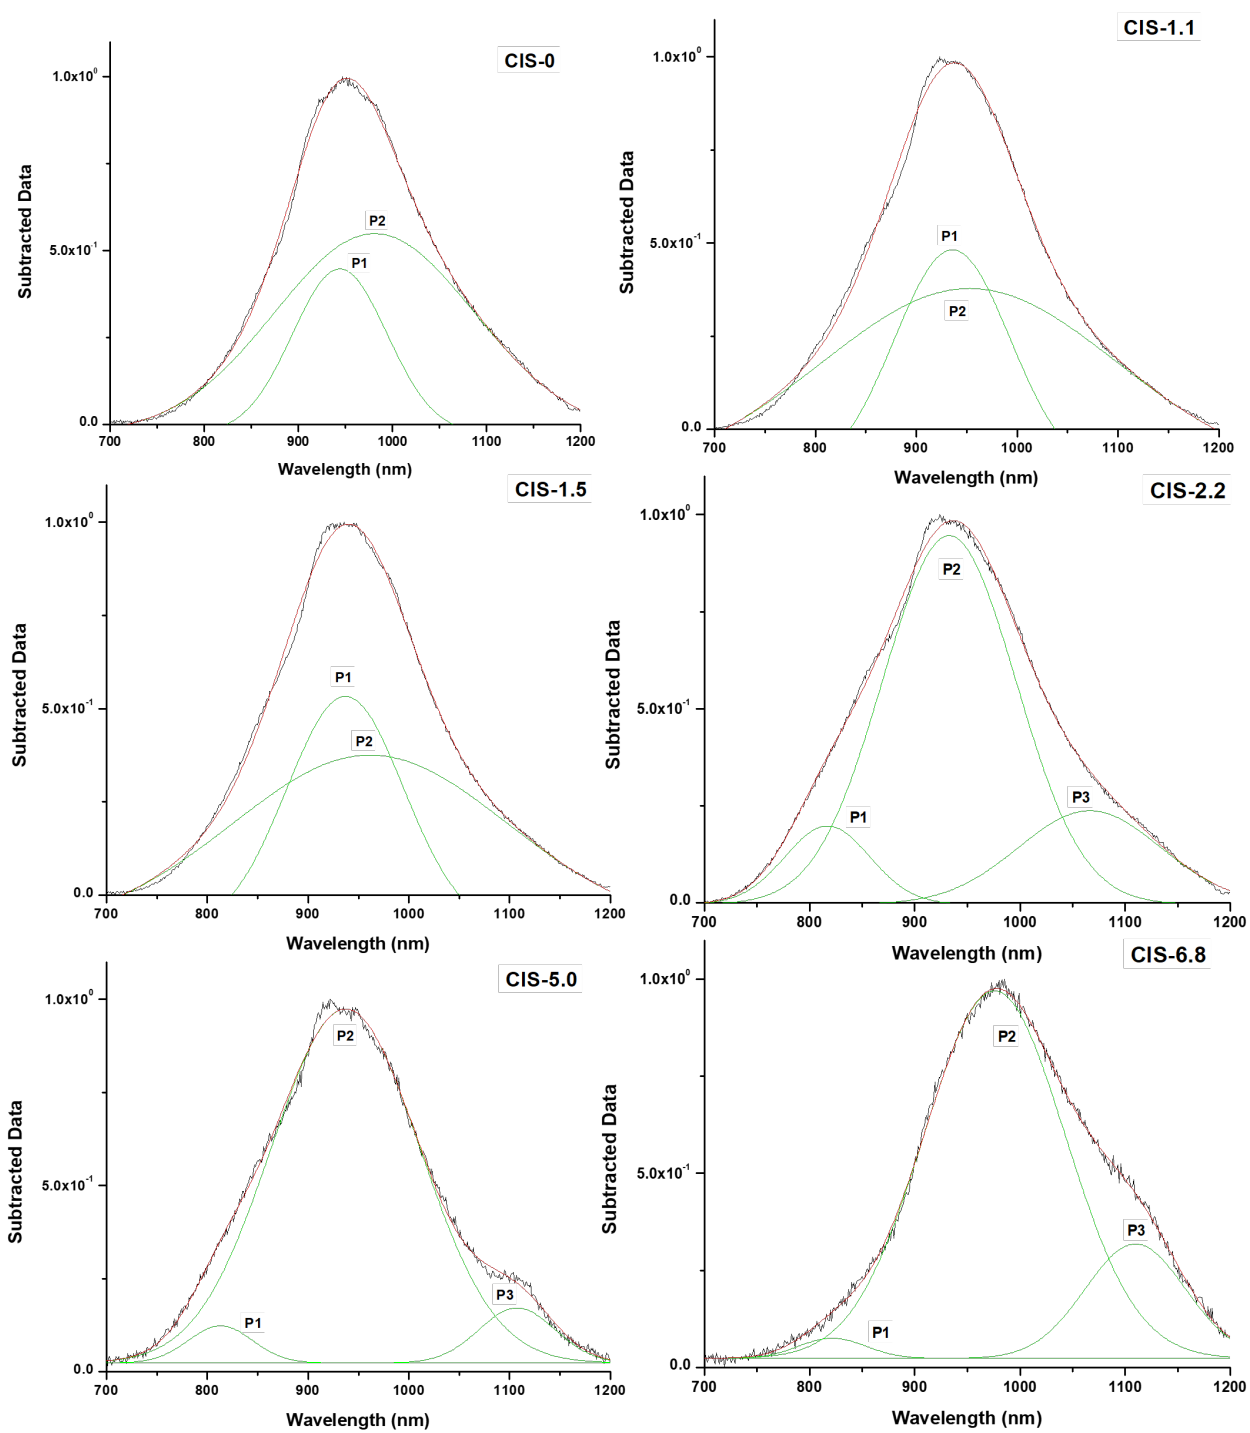

**Fig. S4.** Gaussian deconvolution of photoluminescence spectra for CIS quantum dots. Black – original, red – gaussian fit, green – fitted components.

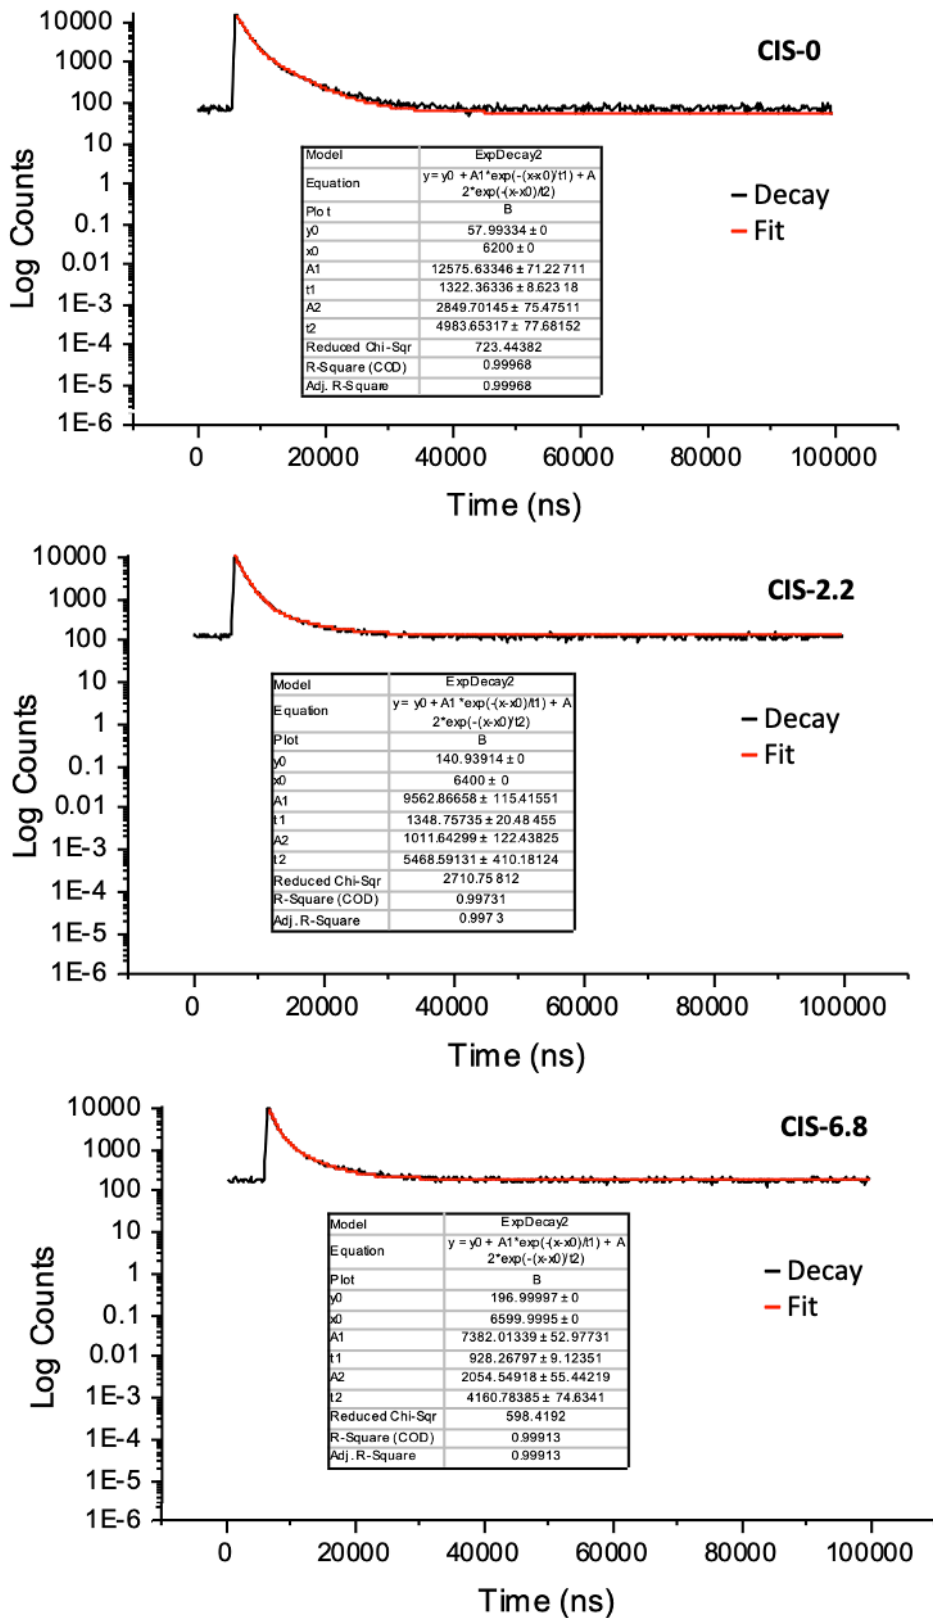

**Fig. S5.** Representative Gaussian fitting of time-resolved PL decay curves for CIS quantum dots.
